# Supplementary material
Source: PubMed Central journal article supplement (PMC4746708)
Supplement: NIHMS756446-supplement-supplement_1.pdf [file NIHMS756446-supplement-supplement_1.pdf]

# Supporting information

## Chloride Incorporation Process in $\text{CH}_3\text{NH}_3\text{PbI}_{3-x}\text{Cl}_x$ Perovskites via Nanoscale Bandgap Maps

*Jungseok Chae,<sup>1,2</sup> Qingfeng Dong,<sup>3</sup> Jinsong Huang,<sup>3\*</sup> Andrea Centrone<sup>1\*</sup>*

<sup>1</sup> Center for Nanoscale Science and Technology, National Institute of Standards and Technology, 100 Bureau Drive, Gaithersburg, MD 20899, USA;

<sup>2</sup> Maryland Nanocenter, University of Maryland, College Park, MD 20742 USA

<sup>3</sup> Department of Mechanical and Materials Engineering, University of Nebraska-Lincoln, Lincoln, Nebraska 68588-0656, USA;

\*corresponding author e-mail: [andrea.centrone@nist.gov](mailto:andrea.centrone@nist.gov) and [jhuang2@unl.edu](mailto:jhuang2@unl.edu)

**Table S1: Summary of annealing history for MAPbI<sub>3-x</sub>Cl<sub>x</sub> sample:** The text with the light red background highlights the extra annealing treatment with respect to the previous step.

| <i>Annealing cycle</i> | <i>A0, “as prepared”:</i><br>T (°C), t (min) | <i>A5:</i><br>T (°C), t (min) | <i>A20:</i><br>T (°C), t (min) | <i>A30:</i><br>T (°C), t (min) |
|------------------------|----------------------------------------------|-------------------------------|--------------------------------|--------------------------------|
| Cycle 1                | 60°C, 60 min                                 | 60°C, 60 min                  | 60°C, 60 min                   | 60°C, 60 min                   |
| Cycle 2                | -                                            | 95°C, 5 min                   | 95°C, 5 min                    | 95°C, 5 min                    |
| Cycle 3                | -                                            | -                             | 95°C, 5 min<br>110°C, 10 min   | 95°C, 5 min<br>110°C, 10 min   |
| Cycle 4                | -                                            | -                             | -                              | 110°C, 10 min                  |

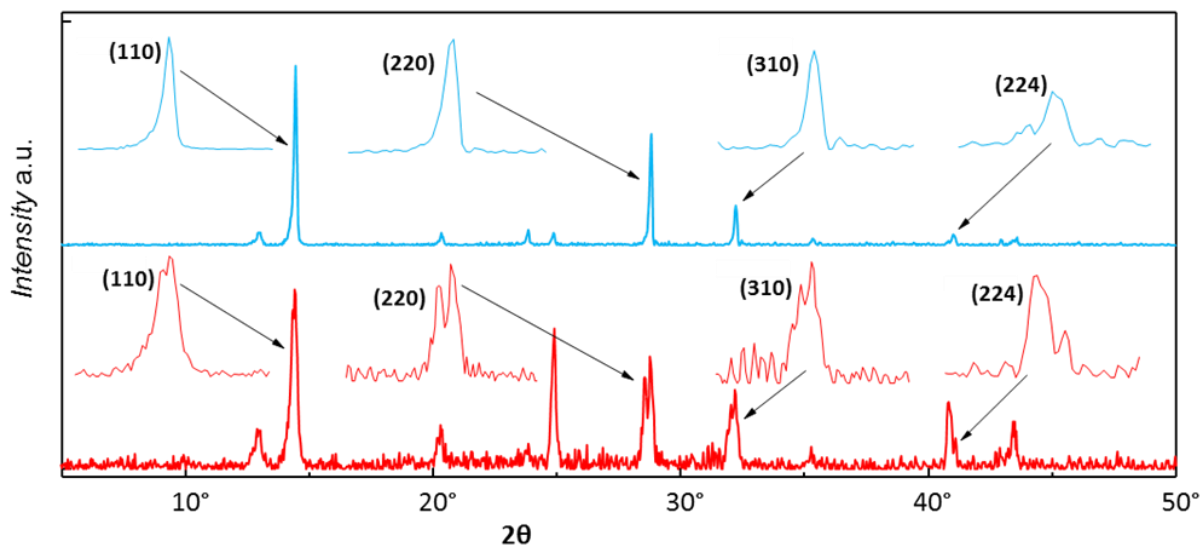

**Figure S1.** XRD patterns of a MAPbI<sub>3-x</sub>Cl<sub>x</sub> film dried in air (red) and after annealing 110 °C 150 min (blue). The data are normalized with respect to the strongest peak intensity and are displayed with an offset for clarity

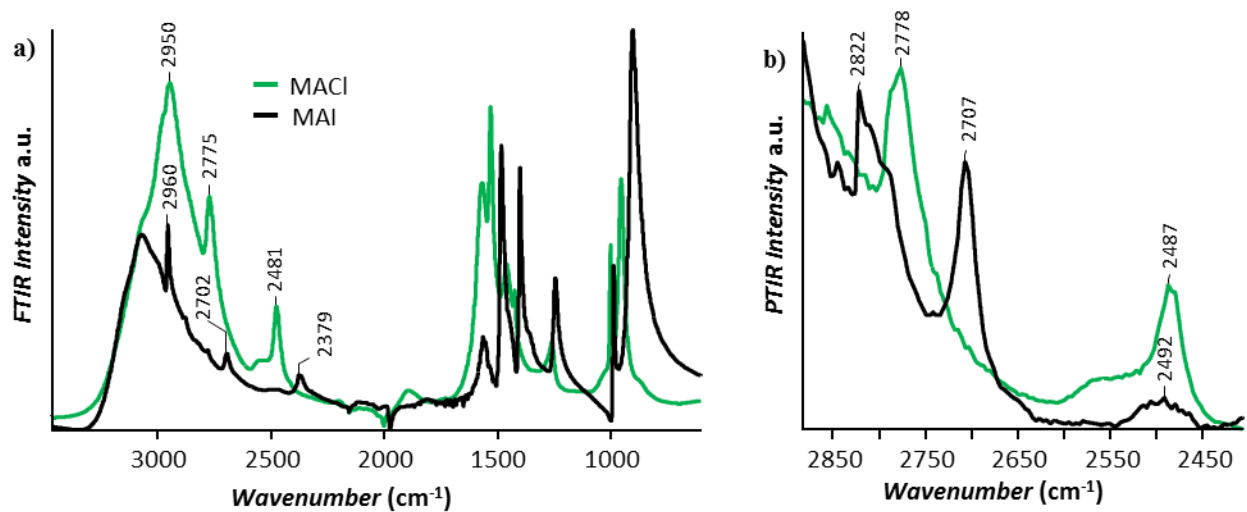

**Figure S2.** (a) FTIR spectra of the MAI and MAI precursor powders obtained using a diamond attenuated internal reflection accessory. (b) PTIR spectra of the MAI and MAI precursor films.

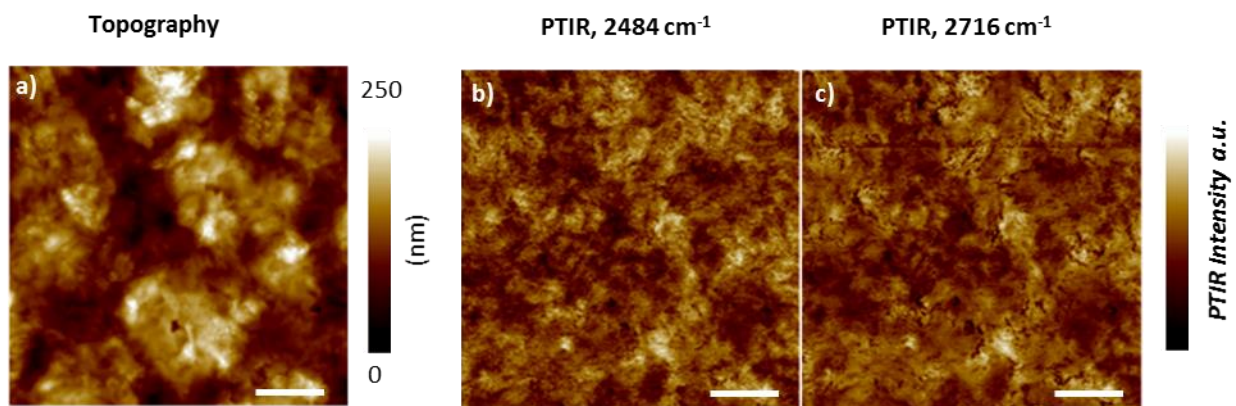

**Figure S3.** a) AFM topography image of as prepared  $\text{MAPbI}_{3-x}\text{Cl}_x$  film; b, c) corresponding PTIR maps obtained by illuminating the sample at  $2484\text{ cm}^{-1}$  and  $2716\text{ cm}^{-1}$  respectively. The PTIR maps are plotted in a common full scale and all scale bars are  $2.0\text{ }\mu\text{m}$ .

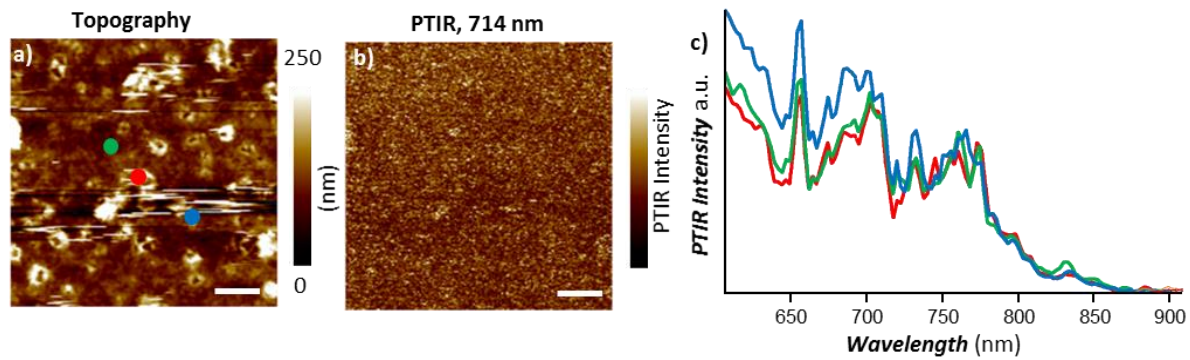

**Figure S4.** a) AFM topography image of the as prepared MAPbI<sub>3</sub> reference sample; b) corresponding PTIR absorption map obtained by illuminating the sample at 714 nm (1.74 eV) All scale bars are 2.0  $\mu\text{m}$ . (c) PTIR electronic absorption spectra obtained at the marked color-coded locations in panel a.

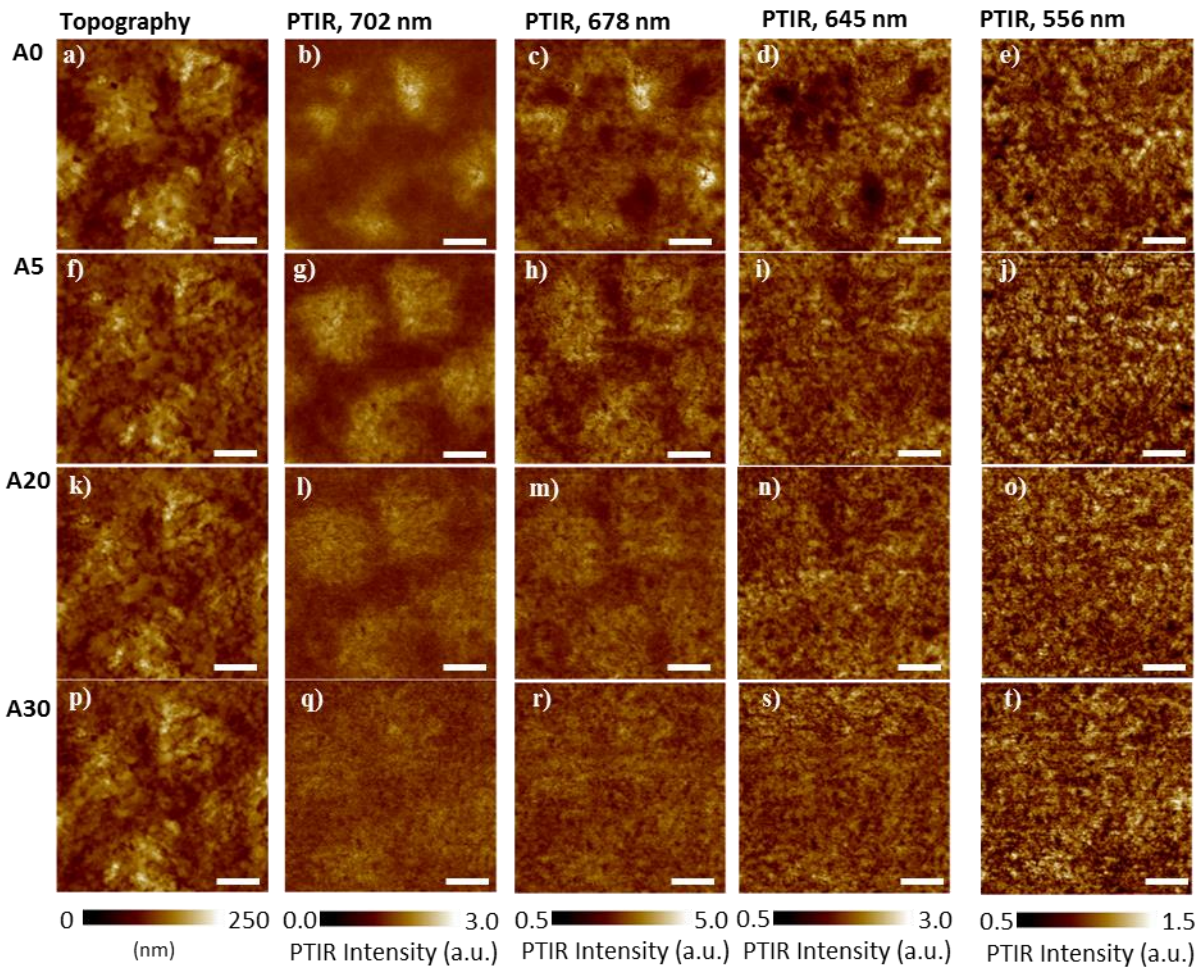

**Figure S5.** AFM height images (first column) and PTIR maps recorded by illuminating MAPbI<sub>3-x</sub>Cl<sub>x</sub> film at 702 nm (1.77 eV, second column), at 678 nm (1.83 eV, 3rd column), at 645 nm (1.92 eV, forth column), and at 556 nm (2.23 eV, fifth column). The data are displayed in rows as a function of the annealing: *A0*, as prepared sample (first row), *A5*, after annealing at 95 °C for 5 min (second row), *A20*, after additional annealing at 95 °C for 5 min and at 110 °C for 10 min (third row), and *A30*, after additional annealing at 110 °C for 10 min (fourth row). All scale bars are 2.0 μm.



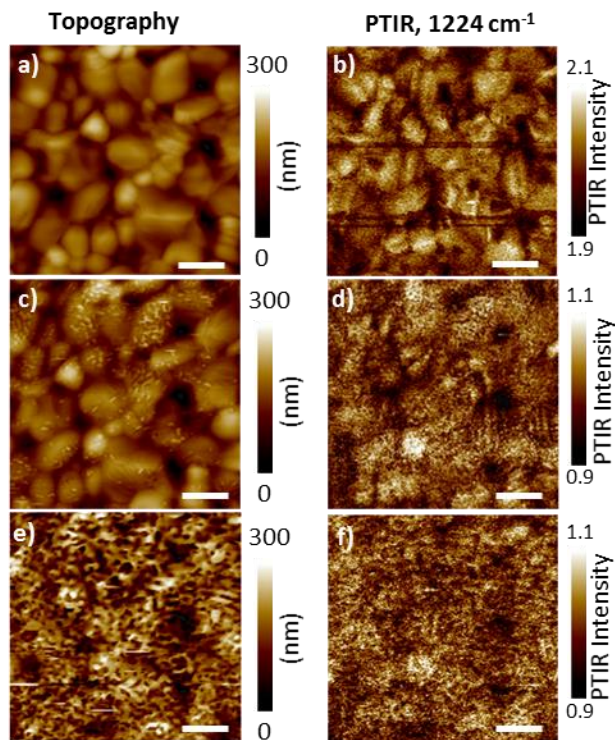

**Figure S6.** Pairs of AFM topography and PTIR absorption map ( $1224\text{ cm}^{-1}$  corresponding to  $\text{NH}_3$  rocking mode of the methylammonium ion) of the  $\text{MAPbI}_3$  sample before annealing (a and b), after 10 minutes annealing at  $140^\circ\text{ C}$  (c and d) and after additional 50 minutes annealing (e and f) at  $140^\circ\text{ C}$ , respectively. The intensity of the PTIR maps are plotted with the same scale range and all scale bars are  $1.0\ \mu\text{m}$ . Substantial material degradation is evident in both the topography and PTIR maps.
